# Supplementary material for: Deben las Comunidades de Propietarios abonar tasas judiciales
Source: publisher site journal article supplement (doi:10.18632/aging.204939), 2013-01-01
Supplement: Supplementary file [file aging-v15i15-204939-supplementary-material-SD3.pdf]

## SUPPLEMENTARY TABLES

**Supplementary Table 1. Clinical characteristics of IDH wild-type GBM cohort of TCGA database.**

|                          | NA ( <i>n</i> = 10) | Deceased ( <i>n</i> = 104) | Living ( <i>n</i> = 49) | Total ( <i>n</i> = 163) | <i>P</i> -Value |
|--------------------------|---------------------|----------------------------|-------------------------|-------------------------|-----------------|
| <b>Gender</b>            |                     |                            |                         |                         |                 |
| Female                   | 5 (50.0%)           | 40 (38.5%)                 | 13 (26.5%)              | 58 (35.6%)              | 0.2193          |
| Male                     | 5 (50.0%)           | 64 (61.5%)                 | 36 (73.5%)              | 105 (64.4%)             |                 |
| <b>Age</b>               |                     |                            |                         |                         |                 |
| Young-aged ( $\leq 30$ ) | 1 (10.0%)           | 1 (1.0%)                   | 3 (6.1%)                | 5 (3.1%)                | 0.2837          |
| Middle-aged (30–60)      | 4 (40.0%)           | 49 (47.1%)                 | 24 (49.0%)              | 77 (47.2%)              |                 |
| Old-aged ( $> 60$ )      | 5 (50.0%)           | 54 (51.9%)                 | 22 (44.9%)              | 81 (49.7%)              |                 |

**Supplementary Table 2. Clinical characteristics of the 47 glioblastoma specimens in IHC assay of MYEF2.**

| Characteristics          | MYEF2 expression                  |                      | Total ( <i>n</i> = 47) | <i>P</i> -Value |
|--------------------------|-----------------------------------|----------------------|------------------------|-----------------|
|                          | (According to IHC staining score) |                      |                        |                 |
|                          | High ( <i>n</i> = 21)             | Low ( <i>n</i> = 26) |                        |                 |
| <b>Gender</b>            |                                   |                      |                        |                 |
| Female                   | 8 (38.1%)                         | 12 (46.2%)           | 20 (42.6%)             | 0.5785          |
| Male                     | 13 (61.9%)                        | 14 (53.8%)           | 27 (57.4%)             |                 |
| <b>Age</b>               |                                   |                      |                        |                 |
| Young-aged ( $\leq 30$ ) | 2 (9.5%)                          | 3 (11.5%)            | 5 (10.6%)              | 0.9716          |
| Middle-aged (30–60)      | 11 (52.4%)                        | 13 (50.0%)           | 24 (51.1%)             |                 |
| Old-aged ( $> 60$ )      | 8 (38.1%)                         | 10 (38.5%)           | 18 (38.3%)             |                 |

**Supplementary Table 3. Sequences of MYEF2siRNAs.**

| Sequences of siRNAs    |                        |
|------------------------|------------------------|
|                        | Sequence (5'–3')       |
| siMYEF2 1#             | GCAACAUCCCAUAUGACAUTT  |
| siMYEF2 2#             | CCCUAGAAACUAUGAACAAATT |
| siMYEF2 3#             | CCUGAAGUCAUCAGUAAUUTT  |
| Negative control siRNA | UUCUCCGAACGUGUCACGUTT  |

**Supplementary Table 4. List of candidate hub genes obtained from the green-yellow module of WGCNA.**

| Candidate hub genes |
|---------------------|
| NOVA1               |
| RAB11FIP1           |
| SEC24D              |
| SOX2                |
| MAP2                |
| MAPT                |
| PTPRZ1              |
| ABCA3               |
| NOVA2               |

CDH10  
CKB  
DDR1  
MYEF2  
NEU4  
SCG3  
TPM3  
TUBB2B  
TTYH1  
BNC2

---
